# Supplementary material
Source: publisher figshare collection journal article supplement (https://acs.figshare.com/ndownloader/files/4164766)
Supplement: Supplementary file 1 [file 4164766]

 
data_saka259_p21c_y2 
  
_audit_creation_method            SHELXL-97 
_chemical_name_systematic 
; 
 ? 
; 
_chemical_name_common             ? 
_chemical_melting_point           ? 
_chemical_formula_moiety          ? 
_chemical_formula_sum 
 'C24 H33 N3 O2' 
_chemical_formula_weight          395.53 
  
loop_ 
 _atom_type_symbol 
 _atom_type_description 
 _atom_type_scat_dispersion_real 
 _atom_type_scat_dispersion_imag 
 _atom_type_scat_source 
 'C'  'C'   0.0033   0.0016 
 'International Tables Vol C Tables 4.2.6.8 and 6.1.1.4' 
 'H'  'H'   0.0000   0.0000 
 'International Tables Vol C Tables 4.2.6.8 and 6.1.1.4' 
 'N'  'N'   0.0061   0.0033 
 'International Tables Vol C Tables 4.2.6.8 and 6.1.1.4' 
 'O'  'O'   0.0106   0.0060 
 'International Tables Vol C Tables 4.2.6.8 and 6.1.1.4' 
  
_symmetry_cell_setting            Monoclinic 
_symmetry_space_group_name_H-M    P2(1)/c 
  
loop_ 
 _symmetry_equiv_pos_as_xyz 
 'x, y, z' 
 '-x, y+1/2, -z+1/2' 
 '-x, -y, -z' 
 'x, -y-1/2, z-1/2' 
  
_cell_length_a                    7.1143(18) 
_cell_length_b                    16.557(4) 
_cell_length_c                    18.936(5) 
_cell_angle_alpha                 90.00 
_cell_angle_beta                  96.930(3) 
_cell_angle_gamma                 90.00 
_cell_volume                      2214.2(10) 
_cell_formula_units_Z             4 
_cell_measurement_temperature     173
_cell_measurement_reflns_used     1427 
_cell_measurement_theta_min       2.46 
_cell_measurement_theta_max       20.56 
  
_exptl_crystal_description        prismatic 
_exptl_crystal_colour             colourless 
_exptl_crystal_size_max           0.15 
_exptl_crystal_size_mid           0.15 
_exptl_crystal_size_min           0.10 
_exptl_crystal_density_meas       ? 
_exptl_crystal_density_diffrn     1.187 
_exptl_crystal_density_method     'not measured' 
_exptl_crystal_F_000              856 
_exptl_absorpt_coefficient_mu     0.076 
_exptl_absorpt_correction_type    empirical 
_exptl_absorpt_correction_T_min   0.9887 
_exptl_absorpt_correction_T_max   0.9924 
_exptl_absorpt_process_details    'SADABS Sheldrick 1997' 
  
_exptl_special_details 
; 
 ? 
; 
  
_diffrn_ambient_temperature       173 
_diffrn_radiation_wavelength      0.71073 
_diffrn_radiation_type            MoK\a 
_diffrn_radiation_source          'fine-focus sealed tube' 
_diffrn_radiation_monochromator   graphite 
_diffrn_measurement_device_type   'Bruker APEX-II CCD' 
_diffrn_measurement_method        '\f and \w scans' 
_diffrn_detector_area_resol_mean  8.333 
_diffrn_reflns_number             10383 
_diffrn_reflns_av_R_equivalents   0.0375 
_diffrn_reflns_av_sigmaI/netI     0.0481 
_diffrn_reflns_limit_h_min        -8 
_diffrn_reflns_limit_h_max        6 
_diffrn_reflns_limit_k_min        -18 
_diffrn_reflns_limit_k_max        19 
_diffrn_reflns_limit_l_min        -20 
_diffrn_reflns_limit_l_max        22 
_diffrn_reflns_theta_min          1.64 
_diffrn_reflns_theta_max          25.03 
_reflns_number_total              3913 
_reflns_number_gt                 2434 
_reflns_threshold_expression      >2sigma(I) 
  
_computing_data_collection        'Bruker APEX2' 
_computing_cell_refinement        'Bruker SAINT' 
_computing_data_reduction         'Bruker SAINT' 
_computing_structure_solution     'SHELXS-97 (Sheldrick, 2008)' 
_computing_structure_refinement   'SHELXL-97 (Sheldrick, 2008)' 
_computing_molecular_graphics     'Bruker SHELXTL' 
_computing_publication_material   'Bruker SHELXTL' 
  
_refine_special_details 
; 
 Refinement of F^2^ against ALL reflections.  The weighted R-factor wR and 
 goodness of fit S are based on F^2^, conventional R-factors R are based 
 on F, with F set to zero for negative F^2^. The threshold expression of 
 F^2^ > 2sigma(F^2^) is used only for calculating R-factors(gt) etc. and is 
 not relevant to the choice of reflections for refinement.  R-factors based 
 on F^2^ are statistically about twice as large as those based on F, and R- 
 factors based on ALL data will be even larger. 
; 
  
_refine_ls_structure_factor_coef  Fsqd 
_refine_ls_matrix_type            full 
_refine_ls_weighting_scheme       calc 
_refine_ls_weighting_details 
 'calc w=1/[\s^2^(Fo^2^)+(0.0645P)^2^+0.1623P] where P=(Fo^2^+2Fc^2^)/3' 
_atom_sites_solution_primary      direct 
_atom_sites_solution_secondary    difmap 
_atom_sites_solution_hydrogens    geom 
_refine_ls_hydrogen_treatment     constr 
_refine_ls_extinction_method      none 
_refine_ls_extinction_coef        ? 
_refine_ls_number_reflns          3913 
_refine_ls_number_parameters      296 
_refine_ls_number_restraints      234 
_refine_ls_R_factor_all           0.0896 
_refine_ls_R_factor_gt            0.0503 
_refine_ls_wR_factor_ref          0.1291 
_refine_ls_wR_factor_gt           0.1147 
_refine_ls_goodness_of_fit_ref    0.970 
_refine_ls_restrained_S_all       0.994 
_refine_ls_shift/su_max           0.000 
_refine_ls_shift/su_mean          0.000 
  
loop_ 
 _atom_site_label 
 _atom_site_type_symbol 
 _atom_site_fract_x 
 _atom_site_fract_y 
 _atom_site_fract_z 
 _atom_site_U_iso_or_equiv 
 _atom_site_adp_type 
 _atom_site_occupancy 
 _atom_site_symmetry_multiplicity 
 _atom_site_calc_flag 
 _atom_site_refinement_flags 
 _atom_site_disorder_assembly 
 _atom_site_disorder_group 
C1 C 0.2336(3) 0.19212(14) 0.86621(11) 0.0469(6) Uani 1 1 d U A . 
C2 C 0.3335(3) 0.23020(11) 0.93267(10) 0.0340(5) Uani 1 1 d U . . 
C3 C 0.4473(3) 0.31032(12) 0.92341(10) 0.0338(5) Uani 1 1 d U . . 
C4 C 0.4925(3) 0.32489(11) 0.84860(10) 0.0343(5) Uani 1 1 d U . . 
C5 C 0.6275(3) 0.38146(11) 0.83520(11) 0.0383(5) Uani 1 1 d U . . 
H5 H 0.6917 0.4109 0.8739 0.046 Uiso 1 1 calc R . . 
C6 C 0.6717(3) 0.39631(12) 0.76726(11) 0.0432(5) Uani 1 1 d U . . 
H6 H 0.7667 0.4346 0.7596 0.052 Uiso 1 1 calc R . . 
C7 C 0.5766(3) 0.35508(13) 0.71111(11) 0.0452(6) Uani 1 1 d U . . 
H7 H 0.6051 0.3651 0.6642 0.054 Uiso 1 1 calc R . . 
C8 C 0.4402(3) 0.29927(14) 0.72238(11) 0.0512(6) Uani 1 1 d U . . 
H8 H 0.3744 0.2713 0.6831 0.061 Uiso 1 1 calc R . . 
C9 C 0.3976(3) 0.28332(14) 0.79093(11) 0.0497(6) Uani 1 1 d U A . 
C10 C 0.6192(3) 0.31816(12) 0.97907(10) 0.0413(5) Uani 1 1 d U . . 
H10A H 0.7203 0.2826 0.9666 0.062 Uiso 1 1 calc R . . 
H10B H 0.5844 0.3027 1.0257 0.062 Uiso 1 1 calc R . . 
H10C H 0.6636 0.3742 0.9808 0.062 Uiso 1 1 calc R . . 
C11 C 0.1863(7) 0.1660(3) 0.7402(3) 0.0438(14) Uani 0.513(7) 1 d PU A 1 
H11A H 0.2799 0.1593 0.7060 0.053 Uiso 0.513(7) 1 calc PR A 1 
H11B H 0.1528 0.1124 0.7581 0.053 Uiso 0.513(7) 1 calc PR A 1 
C12 C 0.0125(9) 0.2115(3) 0.7074(3) 0.0538(15) Uani 0.513(7) 1 d PU A 1 
H12A H 0.0506 0.2659 0.6930 0.065 Uiso 0.513(7) 1 calc PR A 1 
H12B H -0.0761 0.2182 0.7435 0.065 Uiso 0.513(7) 1 calc PR A 1 
C13 C -0.0894(14) 0.1674(6) 0.6424(5) 0.070(3) Uani 0.513(7) 1 d PU A 1 
H13A H -0.0021 0.1606 0.6066 0.106 Uiso 0.513(7) 1 calc PR A 1 
H13B H -0.1990 0.1993 0.6223 0.106 Uiso 0.513(7) 1 calc PR A 1 
H13C H -0.1319 0.1143 0.6569 0.106 Uiso 0.513(7) 1 calc PR A 1 
C11B C 0.0859(9) 0.2191(4) 0.7415(3) 0.0433(14) Uani 0.487(7) 1 d PU A 2 
H11C H -0.0344 0.2128 0.7623 0.052 Uiso 0.487(7) 1 calc PR A 2 
H11D H 0.0786 0.2684 0.7116 0.052 Uiso 0.487(7) 1 calc PR A 2 
C12B C 0.1262(8) 0.1455(3) 0.6985(3) 0.0472(15) Uani 0.487(7) 1 d PU A 2 
H12C H 0.1319 0.0970 0.7294 0.057 Uiso 0.487(7) 1 calc PR A 2 
H12D H 0.2507 0.1517 0.6808 0.057 Uiso 0.487(7) 1 calc PR A 2 
C13B C -0.0259(13) 0.1341(6) 0.6363(5) 0.055(2) Uani 0.487(7) 1 d PU A 2 
H13D H -0.1480 0.1248 0.6539 0.082 Uiso 0.487(7) 1 calc PR A 2 
H13E H 0.0057 0.0874 0.6081 0.082 Uiso 0.487(7) 1 calc PR A 2 
H13F H -0.0338 0.1826 0.6064 0.082 Uiso 0.487(7) 1 calc PR A 2 
C14 C 0.4347(3) 0.16641(12) 0.98327(10) 0.0354(5) Uani 1 1 d U . . 
C15 C 0.6878(3) 0.06982(12) 1.01311(11) 0.0386(5) Uani 1 1 d U . . 
H15A H 0.7260 0.0206 0.9888 0.046 Uiso 1 1 calc R . . 
H15B H 0.6090 0.0529 1.0502 0.046 Uiso 1 1 calc R . . 
C16 C 0.8631(3) 0.11246(13) 1.04807(11) 0.0468(6) Uani 1 1 d U . . 
H16A H 0.8252 0.1631 1.0703 0.056 Uiso 1 1 calc R . . 
H16B H 0.9449 0.1270 1.0113 0.056 Uiso 1 1 calc R . . 
C17 C 0.9751(3) 0.06033(14) 1.10446(12) 0.0524(6) Uani 1 1 d U . . 
H17A H 0.8975 0.0489 1.1427 0.079 Uiso 1 1 calc R . . 
H17B H 1.0902 0.0891 1.1241 0.079 Uiso 1 1 calc R . . 
H17C H 1.0099 0.0095 1.0830 0.079 Uiso 1 1 calc R . . 
C18 C 0.6411(3) 0.12639(12) 0.89099(10) 0.0402(5) Uani 1 1 d U . . 
H18A H 0.7812 0.1277 0.8972 0.048 Uiso 1 1 calc R . . 
H18B H 0.5957 0.1776 0.8679 0.048 Uiso 1 1 calc R . . 
C19 C 0.5749(3) 0.05656(13) 0.84209(11) 0.0473(6) Uani 1 1 d U . . 
H19A H 0.4350 0.0571 0.8324 0.057 Uiso 1 1 calc R . . 
H19B H 0.6139 0.0047 0.8655 0.057 Uiso 1 1 calc R . . 
C20 C 0.6608(4) 0.06384(15) 0.77208(12) 0.0618(7) Uani 1 1 d U . . 
H20A H 0.6228 0.1154 0.7492 0.093 Uiso 1 1 calc R . . 
H20B H 0.6155 0.0193 0.7405 0.093 Uiso 1 1 calc R . . 
H20C H 0.7992 0.0616 0.7817 0.093 Uiso 1 1 calc R . . 
C21 C 0.2705(3) 0.35972(13) 0.94525(11) 0.0454(6) Uani 1 1 d U . . 
C22 C 0.1861(3) 0.27914(12) 0.96823(11) 0.0435(5) Uani 1 1 d U . . 
H22A H 0.1972 0.2720 1.0205 0.052 Uiso 1 1 calc R . . 
H22B H 0.0542 0.2699 0.9465 0.052 Uiso 1 1 calc R . . 
C23 C 0.3142(4) 0.41564(15) 1.00522(15) 0.0645(7) Uani 1 1 d U . . 
C24 C 0.1510(4) 0.40414(17) 0.88491(15) 0.0799(9) Uani 1 1 d U . . 
H24A H 0.0376 0.4263 0.9024 0.120 Uiso 1 1 calc R . . 
H24B H 0.1134 0.3664 0.8459 0.120 Uiso 1 1 calc R . . 
H24C H 0.2253 0.4482 0.8677 0.120 Uiso 1 1 calc R . . 
N1 N 0.2598(3) 0.22338(14) 0.80159(9) 0.0746(7) Uani 1 1 d U . . 
N2 N 0.5748(2) 0.12162(9) 0.96123(8) 0.0361(4) Uani 1 1 d U . . 
N3 N 0.3425(4) 0.45785(16) 1.05290(15) 0.1105(11) Uani 1 1 d U . . 
O1 O 0.1216(2) 0.13691(9) 0.87183(8) 0.0573(5) Uani 1 1 d U . . 
O2 O 0.3899(2) 0.15991(9) 1.04380(7) 0.0457(4) Uani 1 1 d U . . 
  
loop_ 
 _atom_site_aniso_label 
 _atom_site_aniso_U_11 
 _atom_site_aniso_U_22 
 _atom_site_aniso_U_33 
 _atom_site_aniso_U_23 
 _atom_site_aniso_U_13 
 _atom_site_aniso_U_12 
C1 0.0484(14) 0.0575(14) 0.0360(12) -0.0030(11) 0.0095(10) -0.0214(12) 
C2 0.0345(11) 0.0376(11) 0.0313(10) -0.0010(9) 0.0094(9) -0.0069(9) 
C3 0.0354(11) 0.0359(11) 0.0306(11) -0.0005(9) 0.0062(9) -0.0032(9) 
C4 0.0347(11) 0.0357(11) 0.0333(11) 0.0036(9) 0.0070(9) -0.0027(9) 
C5 0.0413(12) 0.0345(11) 0.0396(12) -0.0005(9) 0.0070(10) -0.0034(9) 
C6 0.0473(14) 0.0399(12) 0.0448(13) 0.0061(10) 0.0158(11) -0.0073(10) 
C7 0.0551(14) 0.0478(13) 0.0347(12) 0.0085(10) 0.0136(10) -0.0036(11) 
C8 0.0602(15) 0.0650(15) 0.0282(11) 0.0028(11) 0.0048(11) -0.0207(12) 
C9 0.0505(14) 0.0668(15) 0.0312(12) 0.0041(11) 0.0030(10) -0.0236(12) 
C10 0.0458(13) 0.0408(12) 0.0371(12) -0.0004(10) 0.0034(10) -0.0101(10) 
C11 0.049(3) 0.048(3) 0.033(3) -0.002(2) -0.001(2) -0.007(2) 
C12 0.056(3) 0.057(3) 0.045(3) 0.012(3) -0.010(3) -0.005(3) 
C13 0.071(6) 0.088(7) 0.045(4) 0.015(5) -0.021(4) -0.029(4) 
C11B 0.042(3) 0.048(3) 0.039(3) 0.002(3) -0.001(2) -0.005(3) 
C12B 0.051(3) 0.050(3) 0.041(3) -0.001(2) 0.004(2) -0.005(2) 
C13B 0.051(5) 0.071(6) 0.039(3) -0.002(4) -0.007(3) -0.013(3) 
C14 0.0403(12) 0.0360(11) 0.0317(11) -0.0026(9) 0.0123(9) -0.0083(9) 
C15 0.0411(12) 0.0331(11) 0.0445(12) -0.0001(10) 0.0166(10) -0.0029(9) 
C16 0.0498(14) 0.0393(12) 0.0531(14) 0.0010(11) 0.0127(11) -0.0045(10) 
C17 0.0473(14) 0.0521(14) 0.0589(15) -0.0023(12) 0.0116(12) 0.0029(11) 
C18 0.0493(13) 0.0397(12) 0.0353(11) -0.0043(9) 0.0200(10) -0.0092(10) 
C19 0.0561(14) 0.0455(13) 0.0454(13) -0.0133(11) 0.0262(11) -0.0130(11) 
C20 0.0710(17) 0.0695(16) 0.0508(14) -0.0235(13) 0.0308(13) -0.0205(14) 
C21 0.0470(13) 0.0424(12) 0.0496(13) 0.0054(11) 0.0180(11) 0.0038(10) 
C22 0.0393(12) 0.0482(13) 0.0455(12) 0.0020(10) 0.0156(10) -0.0034(10) 
C23 0.0782(19) 0.0450(15) 0.0789(18) -0.0077(14) 0.0450(15) -0.0052(13) 
C24 0.0589(18) 0.093(2) 0.092(2) 0.0435(17) 0.0262(15) 0.0313(15) 
N1 0.0823(15) 0.1097(17) 0.0304(10) -0.0008(11) 0.0013(10) -0.0674(14) 
N2 0.0428(10) 0.0338(9) 0.0355(9) -0.0004(8) 0.0192(8) -0.0038(8) 
N3 0.152(3) 0.0750(17) 0.120(2) -0.0484(17) 0.080(2) -0.0315(17) 
O1 0.0577(10) 0.0662(10) 0.0501(10) -0.0077(8) 0.0145(8) -0.0355(9) 
O2 0.0548(10) 0.0540(9) 0.0318(8) 0.0049(7) 0.0189(7) 0.0046(7) 
  
_geom_special_details 
; 
 All esds (except the esd in the dihedral angle between two l.s. planes) 
 are estimated using the full covariance matrix.  The cell esds are taken 
 into account individually in the estimation of esds in distances, angles 
 and torsion angles; correlations between esds in cell parameters are only 
 used when they are defined by crystal symmetry.  An approximate (isotropic) 
 treatment of cell esds is used for estimating esds involving l.s. planes. 
; 
  
loop_ 
 _geom_bond_atom_site_label_1 
 _geom_bond_atom_site_label_2 
 _geom_bond_distance 
 _geom_bond_site_symmetry_2 
 _geom_bond_publ_flag 
C1 O1 1.225(2) . ? 
C1 N1 1.362(3) . ? 
C1 C2 1.507(3) . ? 
C2 C22 1.543(3) . ? 
C2 C14 1.544(3) . ? 
C2 C3 1.575(3) . ? 
C3 C4 1.509(3) . ? 
C3 C10 1.521(3) . ? 
C3 C21 1.596(3) . ? 
C4 C5 1.387(3) . ? 
C4 C9 1.394(3) . ? 
C5 C6 1.383(3) . ? 
C5 H5 0.9500 . ? 
C6 C7 1.372(3) . ? 
C6 H6 0.9500 . ? 
C7 C8 1.375(3) . ? 
C7 H7 0.9500 . ? 
C8 C9 1.393(3) . ? 
C8 H8 0.9500 . ? 
C9 N1 1.427(3) . ? 
C10 H10A 0.9800 . ? 
C10 H10B 0.9800 . ? 
C10 H10C 0.9800 . ? 
C11 C12 1.515(9) . ? 
C11 N1 1.543(6) . ? 
C11 H11A 0.9900 . ? 
C11 H11B 0.9900 . ? 
C12 C13 1.535(12) . ? 
C12 H12A 0.9900 . ? 
C12 H12B 0.9900 . ? 
C13 H13A 0.9800 . ? 
C13 H13B 0.9800 . ? 
C13 H13C 0.9800 . ? 
C11B C12B 1.512(9) . ? 
C11B N1 1.578(7) . ? 
C11B H11C 0.9900 . ? 
C11B H11D 0.9900 . ? 
C12B C13B 1.512(12) . ? 
C12B H12C 0.9900 . ? 
C12B H12D 0.9900 . ? 
C13B H13D 0.9800 . ? 
C13B H13E 0.9800 . ? 
C13B H13F 0.9800 . ? 
C14 O2 1.231(2) . ? 
C14 N2 1.349(2) . ? 
C15 N2 1.468(2) . ? 
C15 C16 1.514(3) . ? 
C15 H15A 0.9900 . ? 
C15 H15B 0.9900 . ? 
C16 C17 1.522(3) . ? 
C16 H16A 0.9900 . ? 
C16 H16B 0.9900 . ? 
C17 H17A 0.9800 . ? 
C17 H17B 0.9800 . ? 
C17 H17C 0.9800 . ? 
C18 N2 1.466(2) . ? 
C18 C19 1.520(3) . ? 
C18 H18A 0.9900 . ? 
C18 H18B 0.9900 . ? 
C19 C20 1.530(3) . ? 
C19 H19A 0.9900 . ? 
C19 H19B 0.9900 . ? 
C20 H20A 0.9800 . ? 
C20 H20B 0.9800 . ? 
C20 H20C 0.9800 . ? 
C21 C23 1.469(3) . ? 
C21 C24 1.528(3) . ? 
C21 C22 1.547(3) . ? 
C22 H22A 0.9900 . ? 
C22 H22B 0.9900 . ? 
C23 N3 1.140(3) . ? 
C24 H24A 0.9800 . ? 
C24 H24B 0.9800 . ? 
C24 H24C 0.9800 . ? 
  
loop_ 
 _geom_angle_atom_site_label_1 
 _geom_angle_atom_site_label_2 
 _geom_angle_atom_site_label_3 
 _geom_angle 
 _geom_angle_site_symmetry_1 
 _geom_angle_site_symmetry_3 
 _geom_angle_publ_flag 
O1 C1 N1 121.49(19) . . ? 
O1 C1 C2 119.06(18) . . ? 
N1 C1 C2 119.29(18) . . ? 
C1 C2 C22 107.89(17) . . ? 
C1 C2 C14 111.69(16) . . ? 
C22 C2 C14 112.26(16) . . ? 
C1 C2 C3 117.16(16) . . ? 
C22 C2 C3 89.52(14) . . ? 
C14 C2 C3 115.97(15) . . ? 
C4 C3 C10 113.10(16) . . ? 
C4 C3 C2 114.19(15) . . ? 
C10 C3 C2 112.08(16) . . ? 
C4 C3 C21 115.15(16) . . ? 
C10 C3 C21 111.69(16) . . ? 
C2 C3 C21 88.35(14) . . ? 
C5 C4 C9 118.06(18) . . ? 
C5 C4 C3 120.69(17) . . ? 
C9 C4 C3 121.23(17) . . ? 
C6 C5 C4 122.05(19) . . ? 
C6 C5 H5 119.0 . . ? 
C4 C5 H5 119.0 . . ? 
C7 C6 C5 119.10(19) . . ? 
C7 C6 H6 120.4 . . ? 
C5 C6 H6 120.4 . . ? 
C6 C7 C8 120.4(2) . . ? 
C6 C7 H7 119.8 . . ? 
C8 C7 H7 119.8 . . ? 
C7 C8 C9 120.6(2) . . ? 
C7 C8 H8 119.7 . . ? 
C9 C8 H8 119.7 . . ? 
C8 C9 C4 119.82(19) . . ? 
C8 C9 N1 119.60(19) . . ? 
C4 C9 N1 120.56(18) . . ? 
C3 C10 H10A 109.5 . . ? 
C3 C10 H10B 109.5 . . ? 
H10A C10 H10B 109.5 . . ? 
C3 C10 H10C 109.5 . . ? 
H10A C10 H10C 109.5 . . ? 
H10B C10 H10C 109.5 . . ? 
C12 C11 N1 100.9(5) . . ? 
C12 C11 H11A 111.6 . . ? 
N1 C11 H11A 111.6 . . ? 
C12 C11 H11B 111.6 . . ? 
N1 C11 H11B 111.6 . . ? 
H11A C11 H11B 109.4 . . ? 
C11 C12 C13 112.0(6) . . ? 
C11 C12 H12A 109.2 . . ? 
C13 C12 H12A 109.2 . . ? 
C11 C12 H12B 109.2 . . ? 
C13 C12 H12B 109.2 . . ? 
H12A C12 H12B 107.9 . . ? 
C12B C11B N1 104.0(5) . . ? 
C12B C11B H11C 111.0 . . ? 
N1 C11B H11C 111.0 . . ? 
C12B C11B H11D 111.0 . . ? 
N1 C11B H11D 111.0 . . ? 
H11C C11B H11D 109.0 . . ? 
C11B C12B C13B 110.8(6) . . ? 
C11B C12B H12C 109.5 . . ? 
C13B C12B H12C 109.5 . . ? 
C11B C12B H12D 109.5 . . ? 
C13B C12B H12D 109.5 . . ? 
H12C C12B H12D 108.1 . . ? 
C12B C13B H13D 109.5 . . ? 
C12B C13B H13E 109.5 . . ? 
H13D C13B H13E 109.5 . . ? 
C12B C13B H13F 109.5 . . ? 
H13D C13B H13F 109.5 . . ? 
H13E C13B H13F 109.5 . . ? 
O2 C14 N2 121.63(18) . . ? 
O2 C14 C2 118.93(18) . . ? 
N2 C14 C2 119.38(16) . . ? 
N2 C15 C16 112.06(16) . . ? 
N2 C15 H15A 109.2 . . ? 
C16 C15 H15A 109.2 . . ? 
N2 C15 H15B 109.2 . . ? 
C16 C15 H15B 109.2 . . ? 
H15A C15 H15B 107.9 . . ? 
C15 C16 C17 112.12(18) . . ? 
C15 C16 H16A 109.2 . . ? 
C17 C16 H16A 109.2 . . ? 
C15 C16 H16B 109.2 . . ? 
C17 C16 H16B 109.2 . . ? 
H16A C16 H16B 107.9 . . ? 
C16 C17 H17A 109.5 . . ? 
C16 C17 H17B 109.5 . . ? 
H17A C17 H17B 109.5 . . ? 
C16 C17 H17C 109.5 . . ? 
H17A C17 H17C 109.5 . . ? 
H17B C17 H17C 109.5 . . ? 
N2 C18 C19 113.69(16) . . ? 
N2 C18 H18A 108.8 . . ? 
C19 C18 H18A 108.8 . . ? 
N2 C18 H18B 108.8 . . ? 
C19 C18 H18B 108.8 . . ? 
H18A C18 H18B 107.7 . . ? 
C18 C19 C20 109.94(17) . . ? 
C18 C19 H19A 109.7 . . ? 
C20 C19 H19A 109.7 . . ? 
C18 C19 H19B 109.7 . . ? 
C20 C19 H19B 109.7 . . ? 
H19A C19 H19B 108.2 . . ? 
C19 C20 H20A 109.5 . . ? 
C19 C20 H20B 109.5 . . ? 
H20A C20 H20B 109.5 . . ? 
C19 C20 H20C 109.5 . . ? 
H20A C20 H20C 109.5 . . ? 
H20B C20 H20C 109.5 . . ? 
C23 C21 C24 108.8(2) . . ? 
C23 C21 C22 112.28(18) . . ? 
C24 C21 C22 115.2(2) . . ? 
C23 C21 C3 115.05(19) . . ? 
C24 C21 C3 115.95(18) . . ? 
C22 C21 C3 88.60(15) . . ? 
C2 C22 C21 91.32(15) . . ? 
C2 C22 H22A 113.4 . . ? 
C21 C22 H22A 113.4 . . ? 
C2 C22 H22B 113.4 . . ? 
C21 C22 H22B 113.4 . . ? 
H22A C22 H22B 110.7 . . ? 
N3 C23 C21 177.4(3) . . ? 
C21 C24 H24A 109.5 . . ? 
C21 C24 H24B 109.5 . . ? 
H24A C24 H24B 109.5 . . ? 
C21 C24 H24C 109.5 . . ? 
H24A C24 H24C 109.5 . . ? 
H24B C24 H24C 109.5 . . ? 
C1 N1 C9 124.24(17) . . ? 
C1 N1 C11 111.8(2) . . ? 
C9 N1 C11 119.9(2) . . ? 
C1 N1 C11B 116.8(3) . . ? 
C9 N1 C11B 114.9(3) . . ? 
C11 N1 C11B 42.6(2) . . ? 
C14 N2 C18 125.58(17) . . ? 
C14 N2 C15 118.65(15) . . ? 
C18 N2 C15 115.38(16) . . ? 
  
loop_ 
 _geom_torsion_atom_site_label_1 
 _geom_torsion_atom_site_label_2 
 _geom_torsion_atom_site_label_3 
 _geom_torsion_atom_site_label_4 
 _geom_torsion 
 _geom_torsion_site_symmetry_1 
 _geom_torsion_site_symmetry_2 
 _geom_torsion_site_symmetry_3 
 _geom_torsion_site_symmetry_4 
 _geom_torsion_publ_flag 
O1 C1 C2 C22 -70.4(3) . . . . ? 
N1 C1 C2 C22 105.1(2) . . . . ? 
O1 C1 C2 C14 53.4(3) . . . . ? 
N1 C1 C2 C14 -131.1(2) . . . . ? 
O1 C1 C2 C3 -169.4(2) . . . . ? 
N1 C1 C2 C3 6.1(3) . . . . ? 
C1 C2 C3 C4 -18.1(3) . . . . ? 
C22 C2 C3 C4 -128.04(17) . . . . ? 
C14 C2 C3 C4 117.30(18) . . . . ? 
C1 C2 C3 C10 -148.36(18) . . . . ? 
C22 C2 C3 C10 101.70(18) . . . . ? 
C14 C2 C3 C10 -13.0(2) . . . . ? 
C1 C2 C3 C21 98.85(19) . . . . ? 
C22 C2 C3 C21 -11.09(15) . . . . ? 
C14 C2 C3 C21 -125.75(17) . . . . ? 
C10 C3 C4 C5 -35.0(3) . . . . ? 
C2 C3 C4 C5 -164.75(17) . . . . ? 
C21 C3 C4 C5 95.1(2) . . . . ? 
C10 C3 C4 C9 146.3(2) . . . . ? 
C2 C3 C4 C9 16.5(3) . . . . ? 
C21 C3 C4 C9 -83.6(2) . . . . ? 
C9 C4 C5 C6 -1.1(3) . . . . ? 
C3 C4 C5 C6 -179.84(19) . . . . ? 
C4 C5 C6 C7 1.3(3) . . . . ? 
C5 C6 C7 C8 -0.5(3) . . . . ? 
C6 C7 C8 C9 -0.5(4) . . . . ? 
C7 C8 C9 C4 0.7(4) . . . . ? 
C7 C8 C9 N1 -178.0(2) . . . . ? 
C5 C4 C9 C8 0.1(3) . . . . ? 
C3 C4 C9 C8 178.8(2) . . . . ? 
C5 C4 C9 N1 178.8(2) . . . . ? 
C3 C4 C9 N1 -2.4(3) . . . . ? 
N1 C11 C12 C13 179.0(5) . . . . ? 
N1 C11B C12B C13B -178.1(5) . . . . ? 
C1 C2 C14 O2 -120.5(2) . . . . ? 
C22 C2 C14 O2 0.8(2) . . . . ? 
C3 C2 C14 O2 101.7(2) . . . . ? 
C1 C2 C14 N2 62.2(2) . . . . ? 
C22 C2 C14 N2 -176.49(17) . . . . ? 
C3 C2 C14 N2 -75.6(2) . . . . ? 
N2 C15 C16 C17 177.17(16) . . . . ? 
N2 C18 C19 C20 -176.44(19) . . . . ? 
C4 C3 C21 C23 -118.8(2) . . . . ? 
C10 C3 C21 C23 11.9(2) . . . . ? 
C2 C3 C21 C23 125.09(18) . . . . ? 
C4 C3 C21 C24 9.6(3) . . . . ? 
C10 C3 C21 C24 140.4(2) . . . . ? 
C2 C3 C21 C24 -106.4(2) . . . . ? 
C4 C3 C21 C22 127.13(17) . . . . ? 
C10 C3 C21 C22 -102.09(18) . . . . ? 
C2 C3 C21 C22 11.07(15) . . . . ? 
C1 C2 C22 C21 -107.04(17) . . . . ? 
C14 C2 C22 C21 129.46(16) . . . . ? 
C3 C2 C22 C21 11.45(15) . . . . ? 
C23 C21 C22 C2 -127.89(19) . . . . ? 
C24 C21 C22 C2 106.9(2) . . . . ? 
C3 C21 C22 C2 -11.30(15) . . . . ? 
C24 C21 C23 N3 97(7) . . . . ? 
C22 C21 C23 N3 -32(7) . . . . ? 
C3 C21 C23 N3 -131(7) . . . . ? 
O1 C1 N1 C9 -175.1(2) . . . . ? 
C2 C1 N1 C9 9.4(4) . . . . ? 
O1 C1 N1 C11 -17.9(4) . . . . ? 
C2 C1 N1 C11 166.7(3) . . . . ? 
O1 C1 N1 C11B 28.8(4) . . . . ? 
C2 C1 N1 C11B -146.6(3) . . . . ? 
C8 C9 N1 C1 166.8(2) . . . . ? 
C4 C9 N1 C1 -12.0(4) . . . . ? 
C8 C9 N1 C11 11.3(4) . . . . ? 
C4 C9 N1 C11 -167.5(3) . . . . ? 
C8 C9 N1 C11B -36.7(4) . . . . ? 
C4 C9 N1 C11B 144.5(3) . . . . ? 
C12 C11 N1 C1 108.8(3) . . . . ? 
C12 C11 N1 C9 -92.9(4) . . . . ? 
C12 C11 N1 C11B 2.4(4) . . . . ? 
C12B C11B N1 C1 -98.2(4) . . . . ? 
C12B C11B N1 C9 103.5(4) . . . . ? 
C12B C11B N1 C11 -4.3(3) . . . . ? 
O2 C14 N2 C18 -178.51(18) . . . . ? 
C2 C14 N2 C18 -1.3(3) . . . . ? 
O2 C14 N2 C15 -6.0(3) . . . . ? 
C2 C14 N2 C15 171.25(16) . . . . ? 
C19 C18 N2 C14 -104.5(2) . . . . ? 
C19 C18 N2 C15 82.7(2) . . . . ? 
C16 C15 N2 C14 -92.0(2) . . . . ? 
C16 C15 N2 C18 81.3(2) . . . . ? 
  
_diffrn_measured_fraction_theta_max    0.999 
_diffrn_reflns_theta_full              25.03 
_diffrn_measured_fraction_theta_full   0.999 
_refine_diff_density_max    0.214 
_refine_diff_density_min   -0.246 
_refine_diff_density_rms    0.041 
